# Supplementary material for: Semi-automated Detection of the Timing of Respiratory Muscle Activity: Validation and First Application
Source: PubMed Central journal article supplement (PMC8762204; doi:10.3389/fphys.2021.794598), 2022-01-03

## *Supplementary Material*

# SEMI-AUTOMATED DETECTION OF THE TIMING OF RESPIRATORY MUSCLE ACTIVITY: VALIDATION AND FIRST APPLICATION

Antenor Rodrigues,<sup>1\*</sup> Luc Janssens,<sup>2,3</sup> Daniel Langer,<sup>3,4</sup> Umi Matsumura,<sup>5</sup> Dmitry Rozenberg,<sup>6,7</sup>  
Laurent Brochard,<sup>1,8,9</sup> W. Darlene Reid<sup>8,10,11</sup>

### 1.1 Supplementary Figures

**Figure S1.** Bland-Altman plots and ICC's values for the breath-by-breath detection of  $dP$  of EMG,onset by assessor 1 and 2 for the diaphragm/intercostal (A), parasternal intercostal (B), scalene (C) and sternocleidomastoid (D). AVG: average bias between the results from both assessors. UL and LL: 95% confidence interval of the difference between the results from both assessors. n: number of EMG,onset analyzed.  $dP$ : phased difference between the onset of the electrical activity of the muscle and the start of the inspiration calculated (see text for further details).

**Figure S2.** Bland and Altman plots and ICC's values for the breath-by-breath detection of percentage of the inspiratory time (%Ti) of EMG,onset by assessor 1 and 2 for the diaphragm/intercostal (A), parasternal intercostal (B), scalene (C) and sternocleidomastoid (D). AVG: average bias between the results from both assessors. UL and LL: 95% confidence interval of the difference between the results from both assessors. n: number of EMG,onset analyzed(see text for further details).

**Figure S3.** Bland and Altman plots and ICC's values for the breath-by-breath detection of  $dP$  of EMG,onset by assessor 1 and the algorithm for the diaphragm/intercostal (A), parasternal intercostal (B), scalene (C) and sternocleidomastoid (D). AVG: average bias between the results from both assessors. UL and LL: 95% confidence interval of the difference between the results from both assessors. n: number of EMG,onset analyzed.  $dP$ : phased difference between the onset of the electrical activity of the muscle and the start of the inspiration calculated (see text for further details).

**Figure S4.** Bland and Altman plots and ICC's values for the breath-by-breath detection of percentage of the inspiratory time (%Ti) of EMG,onset by assessor 1 and the algorithm for the diaphragm/intercostal (A), parasternal intercostal (B), scalene (C) and sternocleidomastoid (D). AVG: average bias between

the results from both assessors. UL and LL: 95% confidence interval of the difference between the results from both assessors. n: number of EMG,onset analyzed (see text for further details).

**Figure S5.** Bland and Altman plots and ICC's values for the breath-by-breath detection of *dP* of EMG,onset by assessor 2 and the algorithm for the diaphragm/intercostal (A), parasternal intercostal (B), scalene (C) and sternocleidomastoid (D). AVG: average bias between the results from both assessors. UL and LL: 95% confidence interval of the difference between the results from both assessors. n: number of EMG,onset analyzed. *dP*: phased difference between the onset of the electrical activity of the muscle and the start of the inspiration calculated (see text for further details).

**Figure S6.** Bland and Altman plots and ICC's values for the breath-by-breath detection of percentage of the inspiratory time (%Ti) of EMG,onset by assessor 2 and the algorithm for the diaphragm/intercostal (A), parasternal intercostal (B), scalene (C) and sternocleidomastoid (D). AVG: average bias between the results from both assessors. UL and LL: 95% confidence interval of the difference between the results from both assessors. n: number of EMG,onset analyzed (see text for further details).

**Figure S7.** Amplitude of the muscle activation during the inspiratory threshold loading. RMS: root mean square of the electromyography. Data is depicted as mean±SE. \* $P < 0.001$  diaphragm/intercostals vs. parasternal intercostal, scalene and sternocleidomastoid. † $P = 0.016$  parasternal intercostal vs. scalene.

**Figure S8.** Correlations between (A) diaphragm/intercostal EMG,onset in percentage of the inspiratory time (%Ti) and diaphragm/intercostal EMG RMS, (B) diaphragm/intercostal EMG,onset in percentage of the inspiratory time (%Ti) and inspiratory flow, (C) diaphragm/intercostal EMG,onset in seconds (dP) and inspiratory flow, (D) diaphragm/intercostal duration of contraction and inspiratory flow.

Figure S1

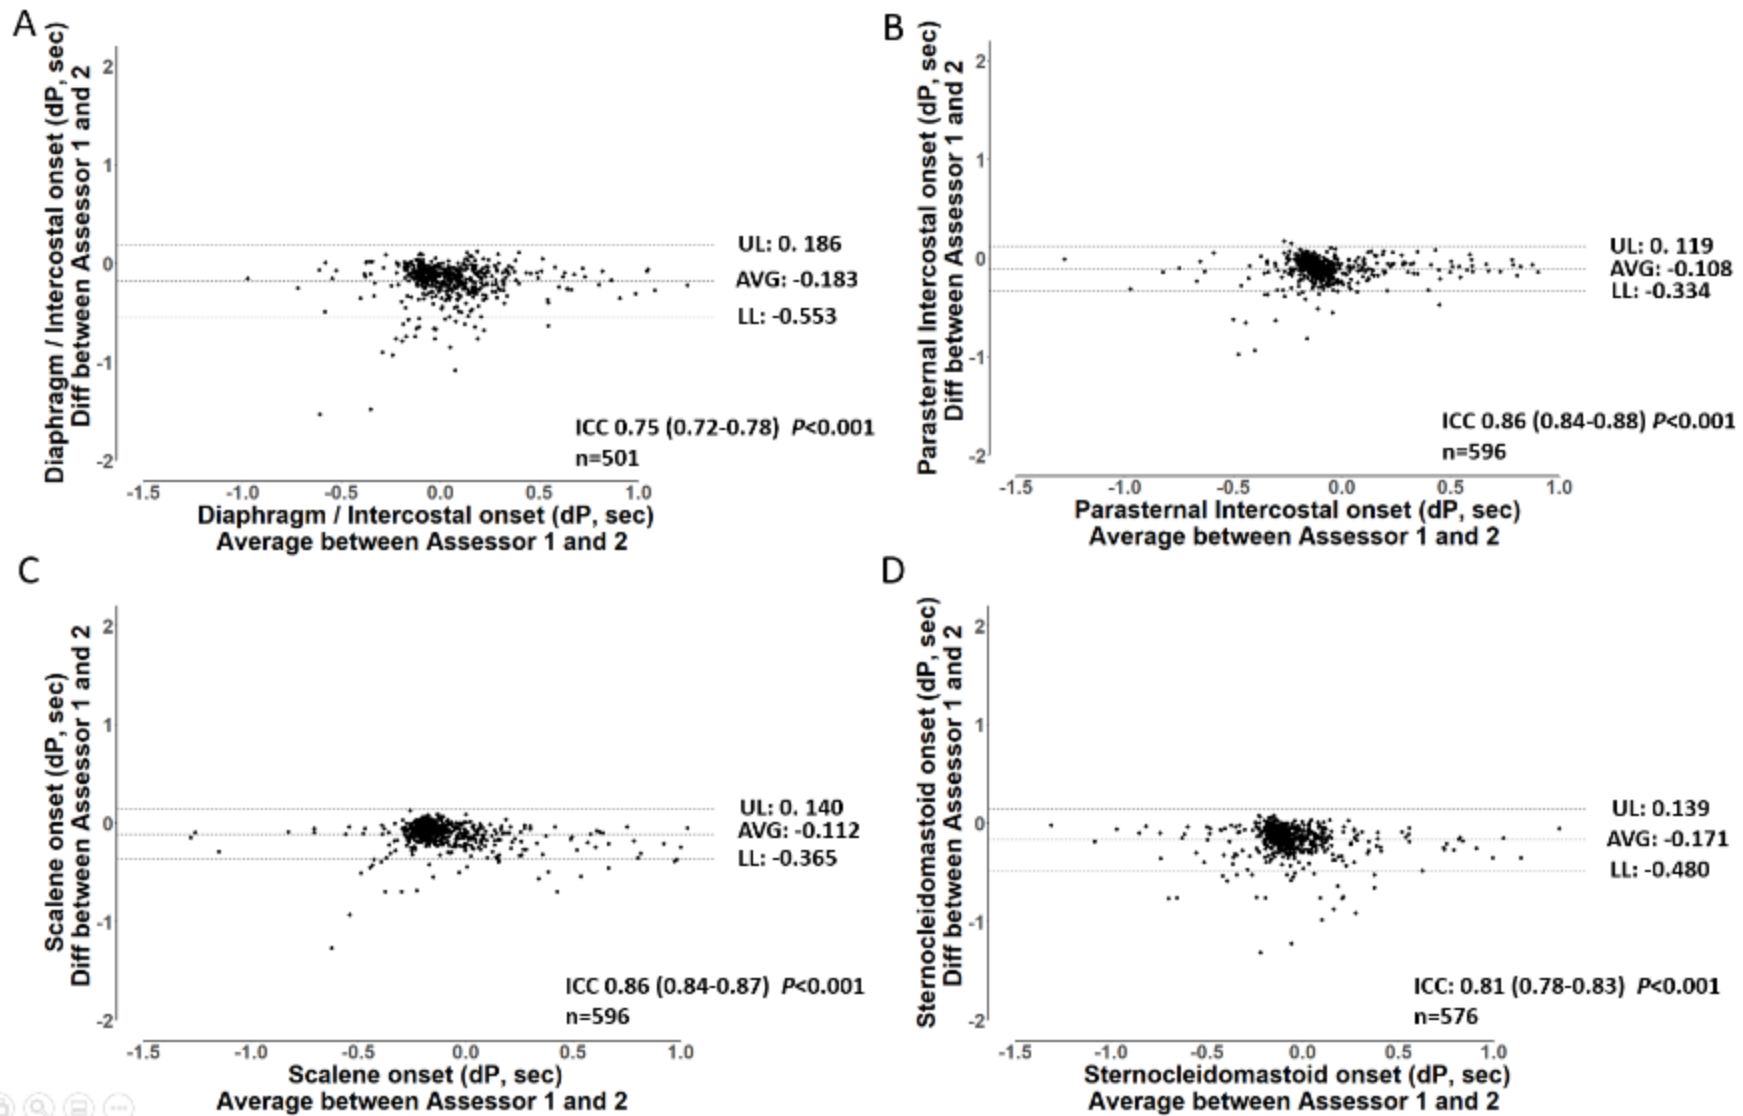

Figure S2

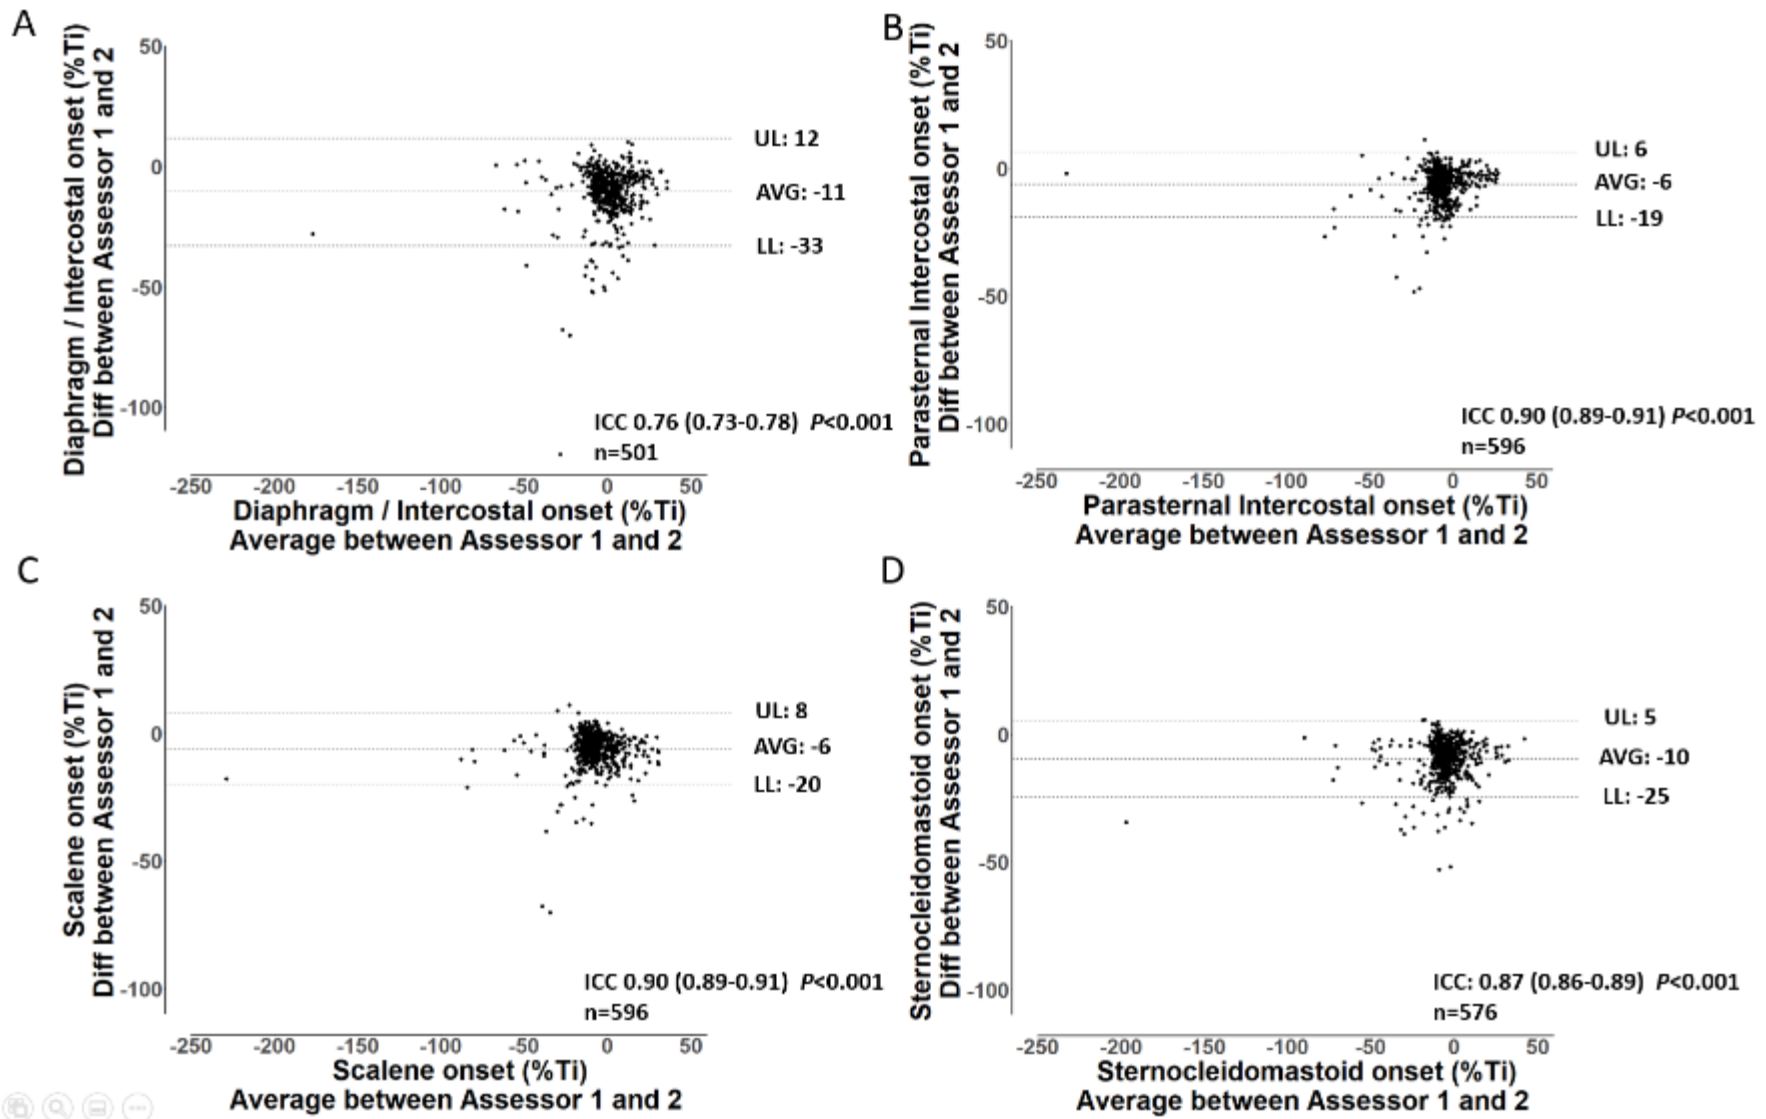

Figure S3

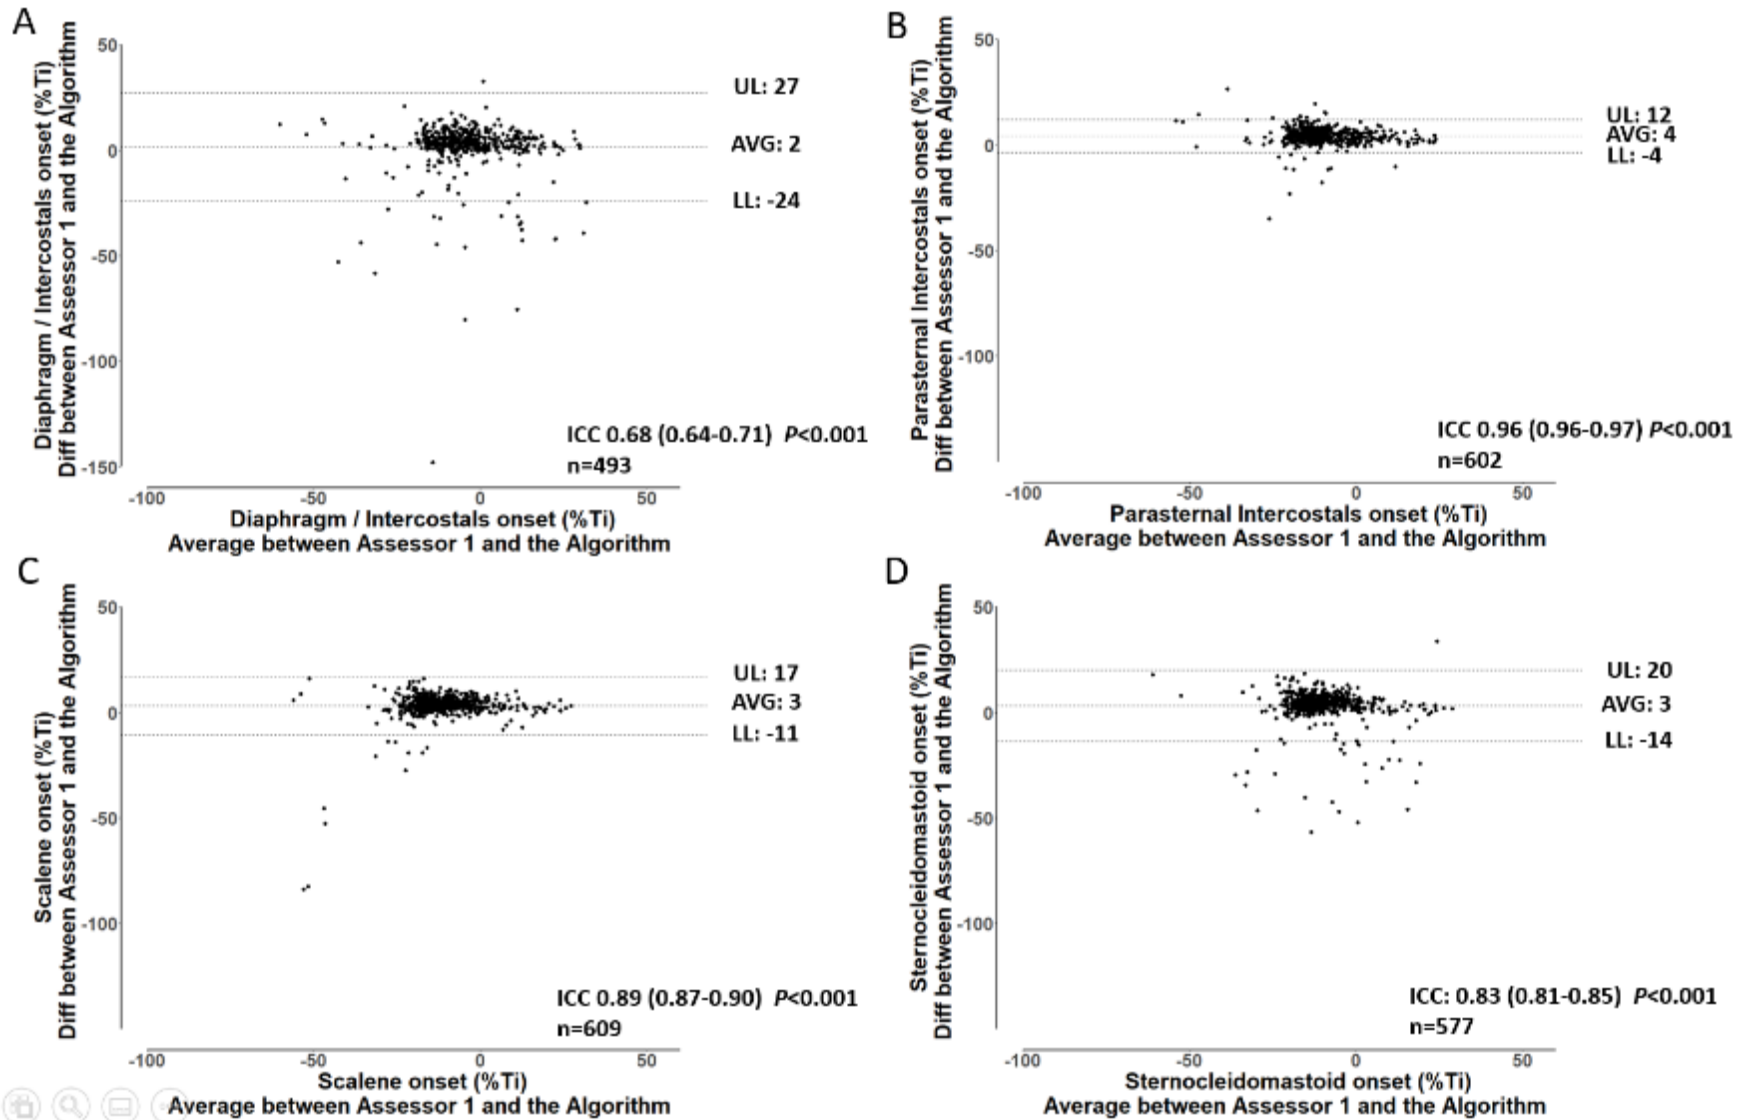

Figure S4

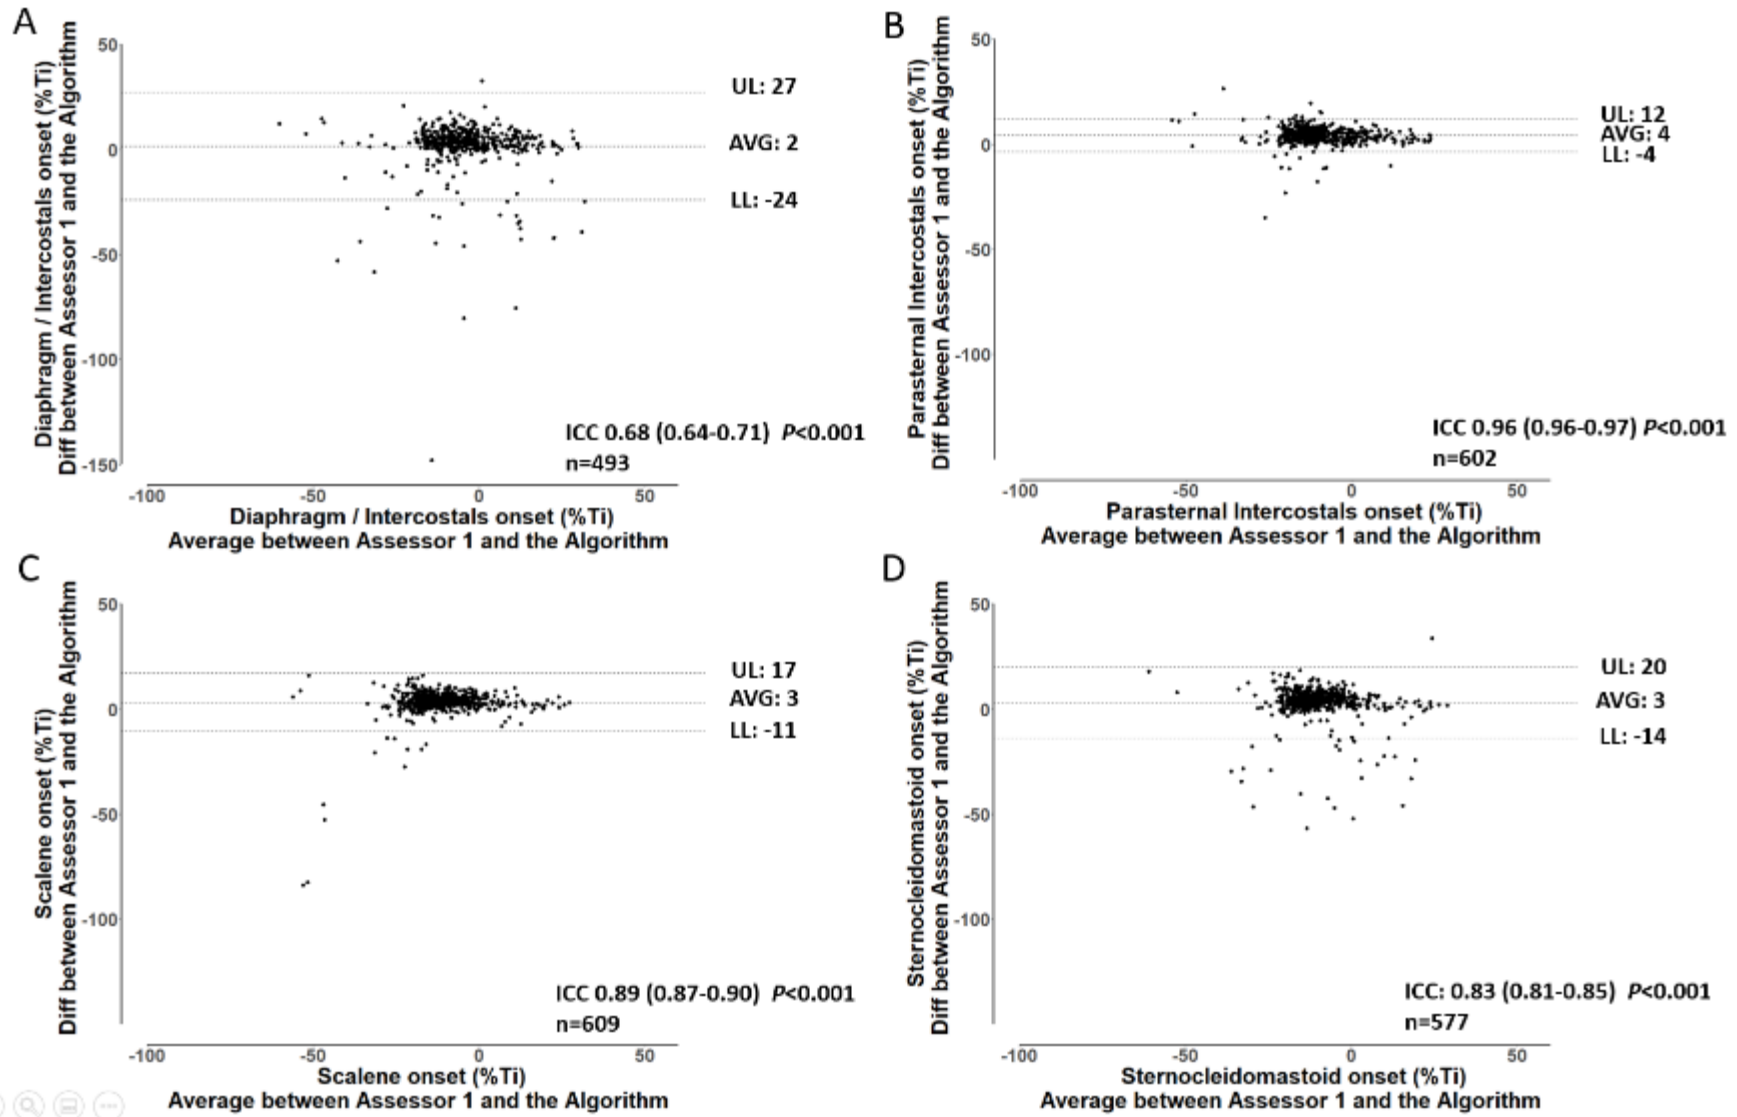

Figure S5

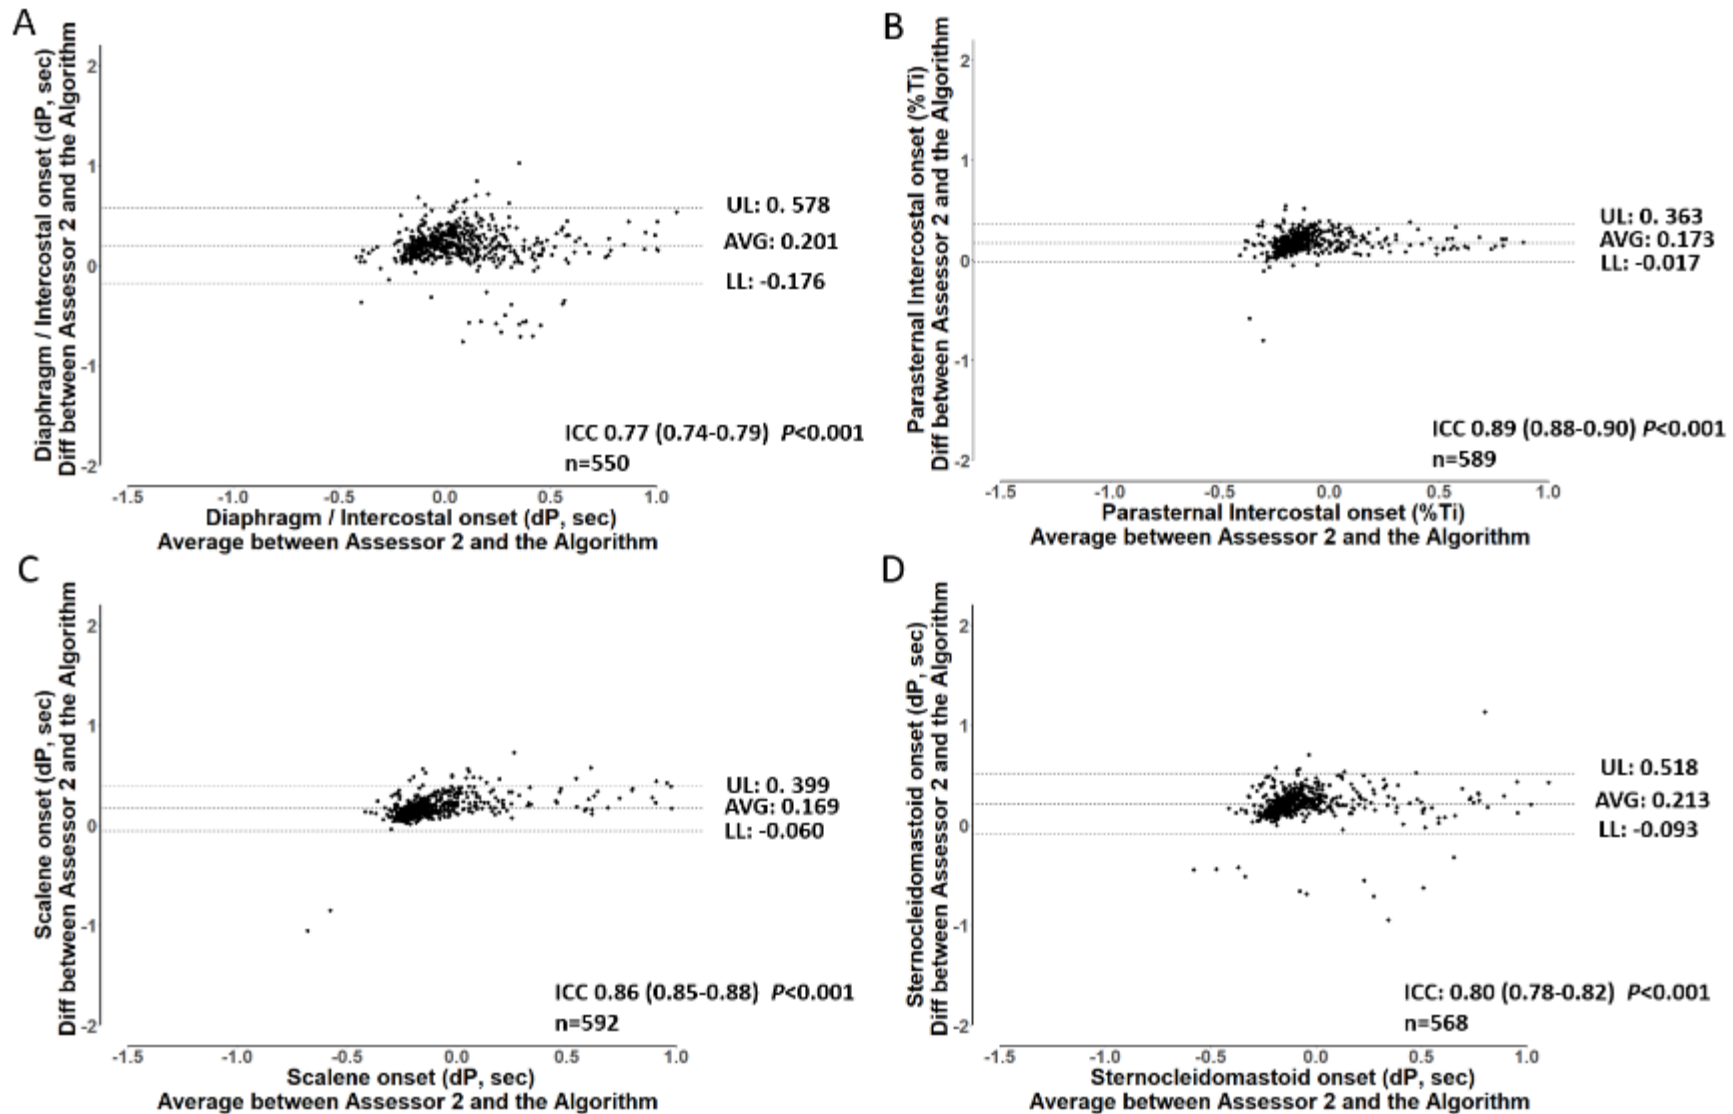

Figure S6

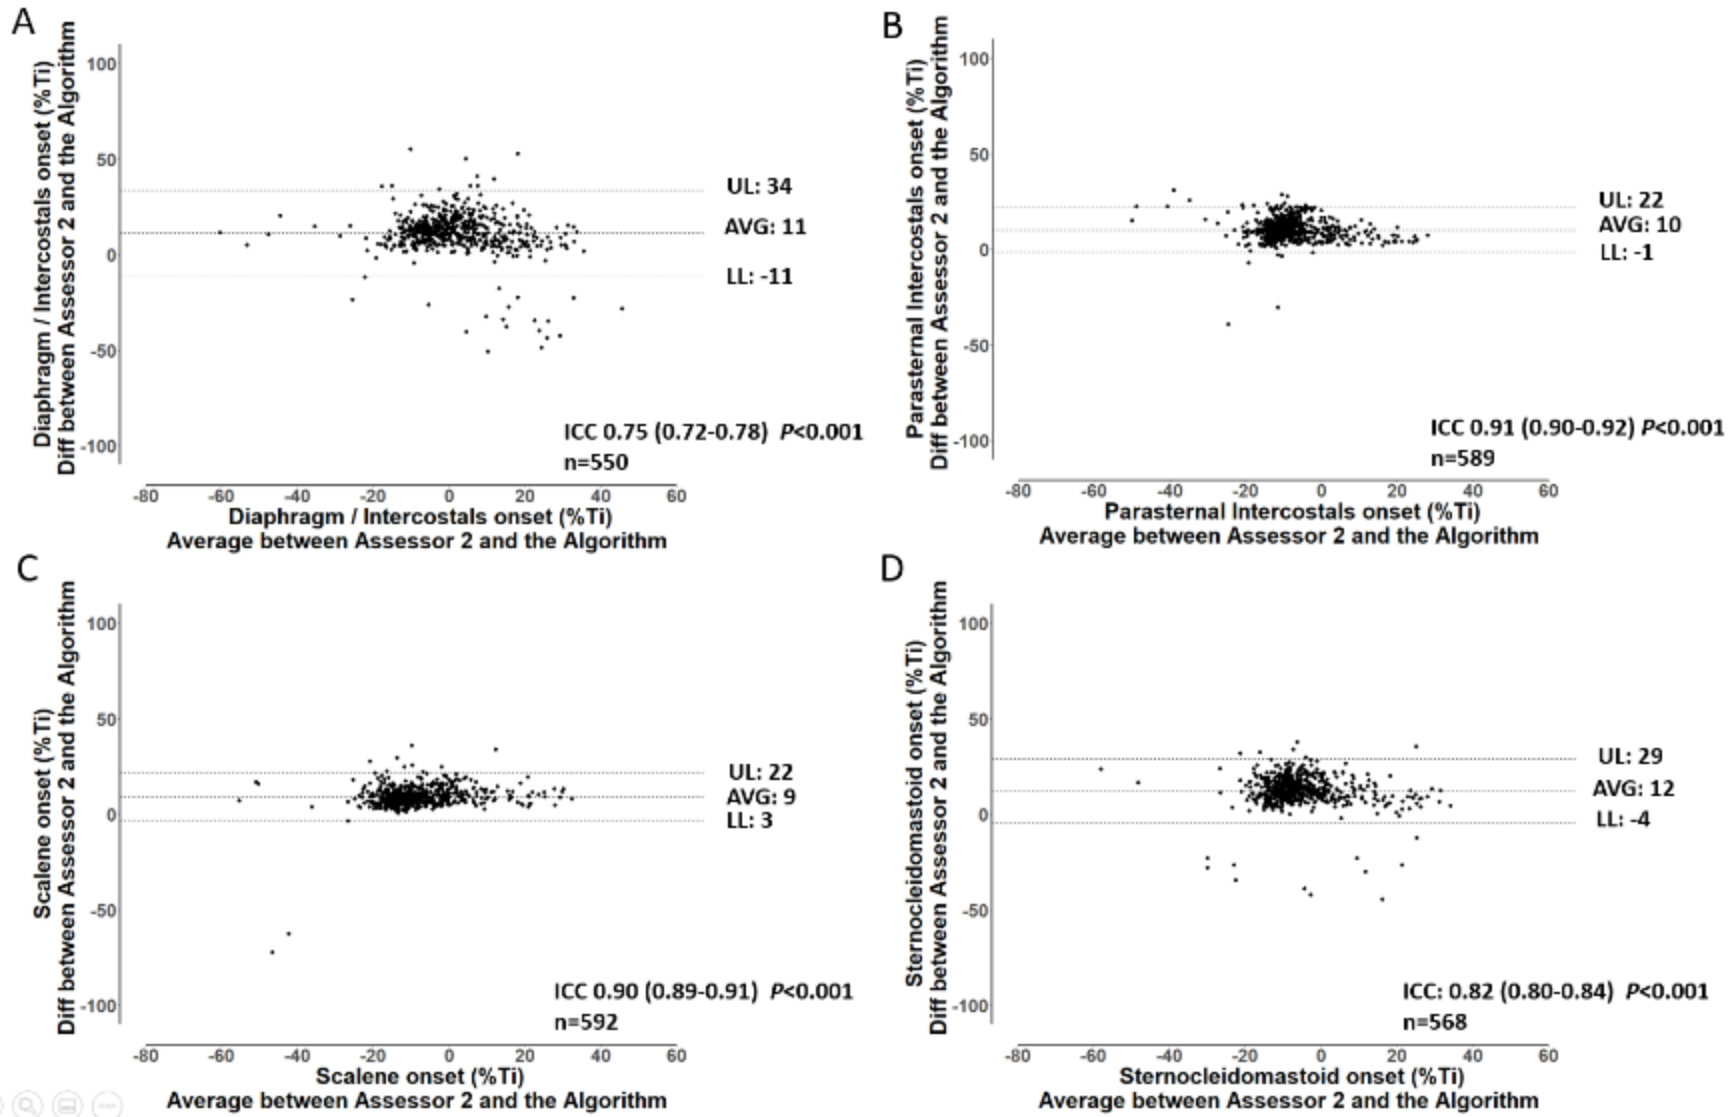



Figure S7

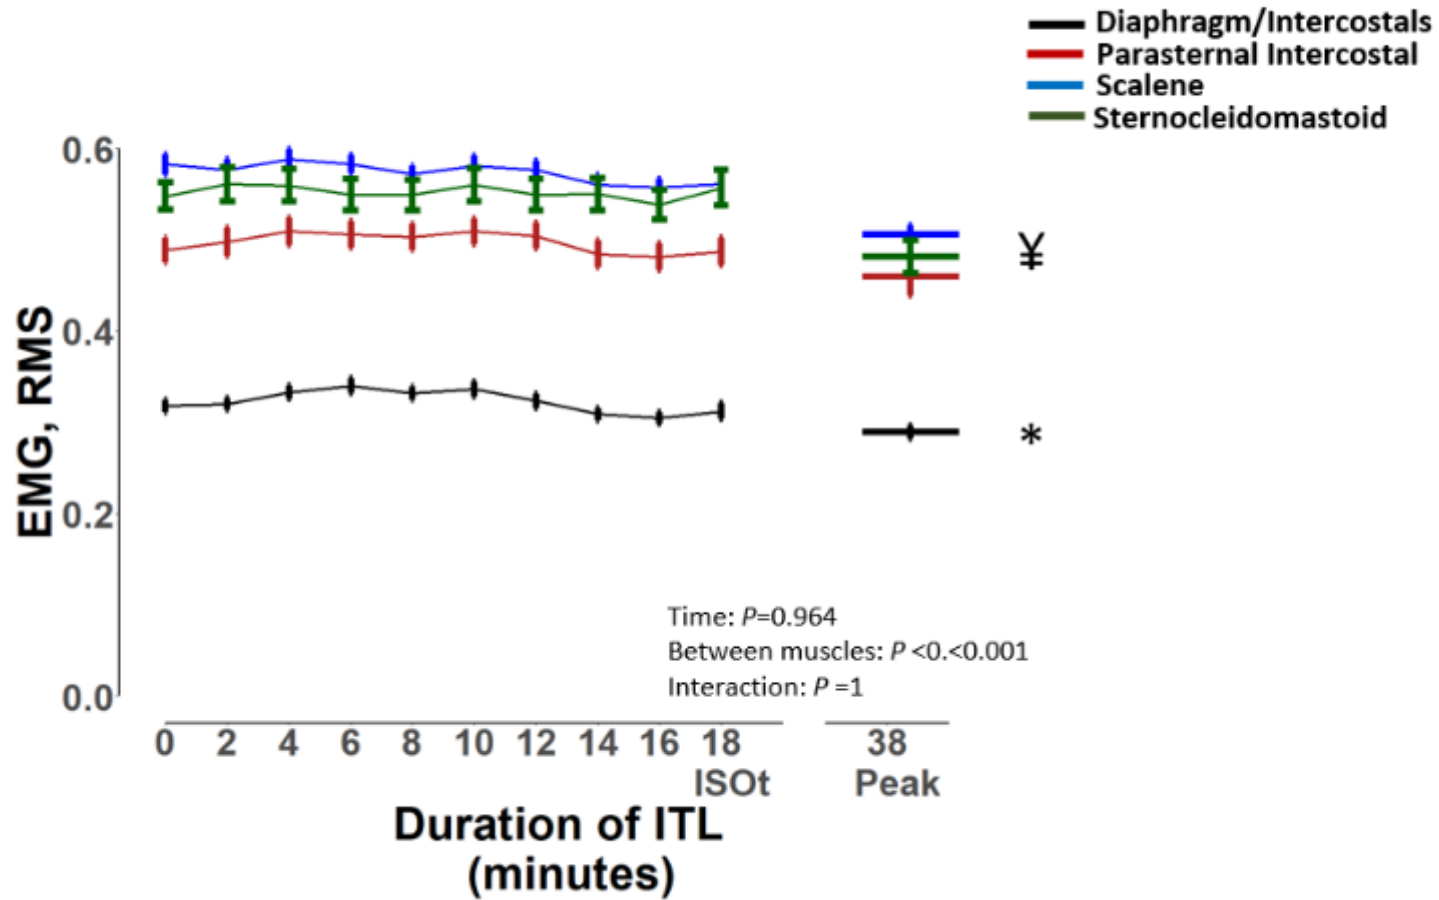

Figure S8

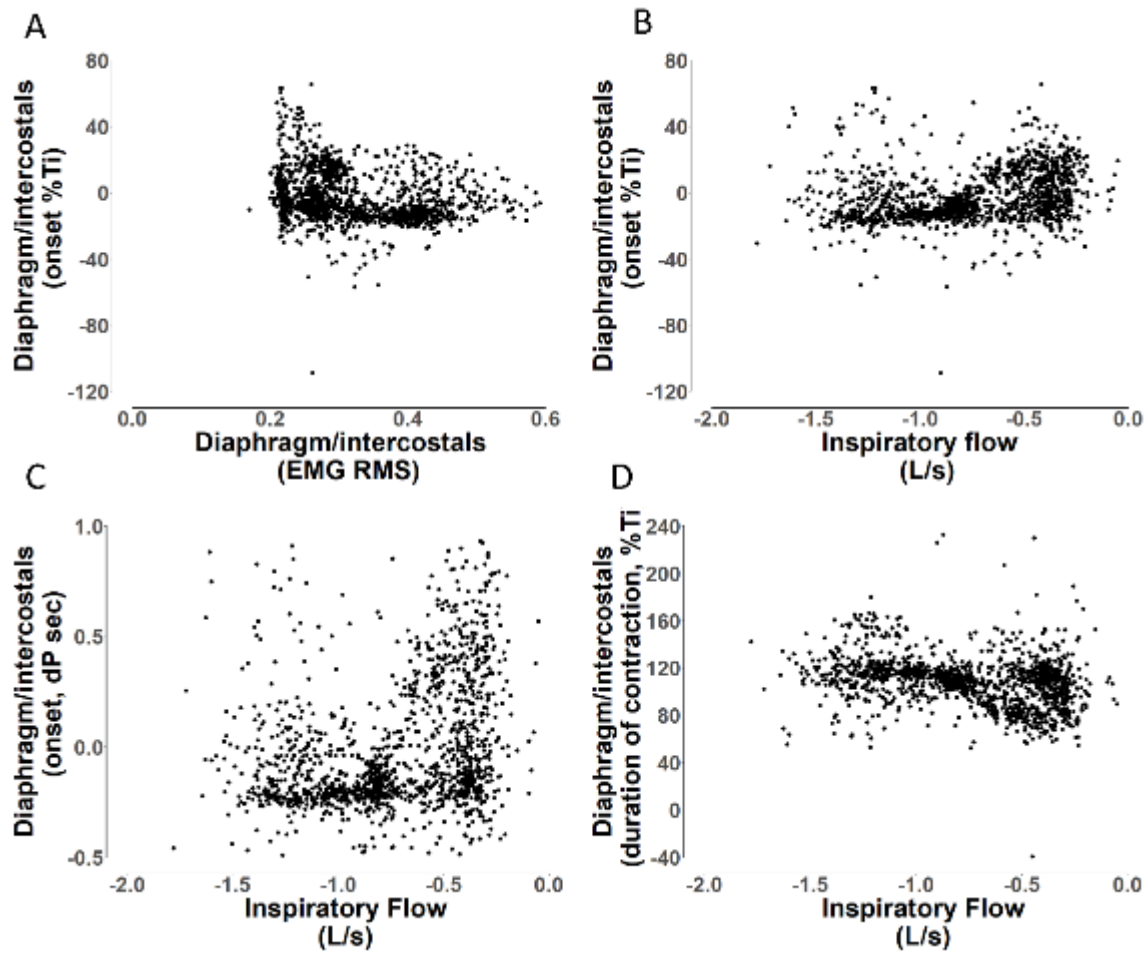

Supplement: Data_Sheet_1.pdf [file Data_Sheet_1.pdf]
